# Supplementary material for: Patients with systemic sclerosis show phenotypic and functional defects in neutrophils
Source: PubMed Central journal article supplement — Allergy. 2021 Sep 20;77(4):1274–84. doi: 10.1111/all.15073 (PMC9293168; doi:10.1111/all.15073), 2021-09-20
Supplement: ALL-77-1274-s001.pdf [file ALL-77-1274-s001.pdf]

**Table S1. Detailed treatments of study patients.** Shown are oral (not indicated), subcutaneous (sc), and intravenous (iv) treatments of the patients included in our study. Some patients did not receive any treatment.

| ID      | Corticosteroids |             |              | Immunosuppressive agents |           |                        |                | Biological agents             |                                                                    |          | Other treatments |             |                      |                      |                        |           |  |
|---------|-----------------|-------------|--------------|--------------------------|-----------|------------------------|----------------|-------------------------------|--------------------------------------------------------------------|----------|------------------|-------------|----------------------|----------------------|------------------------|-----------|--|
|         | Prednisone      | Leflunomide | Methotrexate | Mycophenolate mofetyl    | Rituximab | Tocilizumab (iv or sc) | ACE inhibitors | Angiotensin receptor blockers | Dihydropyridines (nifedipine, nicardipine, amlodipine, felodipine) | Bosentan | Sildenafil       | Prostanoids | Anti-platelet agents | Oral anti-coagulants | Proton pump inhibitors | Diuretics |  |
| SSc-001 |                 | X           |              |                          | X         |                        | X              |                               |                                                                    |          |                  |             |                      |                      |                        |           |  |
| SSc-002 |                 |             |              |                          |           |                        |                |                               |                                                                    |          |                  |             |                      |                      |                        |           |  |
| SSc-003 |                 |             |              |                          |           |                        |                |                               |                                                                    |          |                  |             |                      |                      |                        |           |  |
| SSc-004 |                 |             |              |                          |           |                        |                |                               |                                                                    |          |                  |             |                      |                      |                        |           |  |
| SSc-005 | X               |             | X            |                          |           |                        |                |                               |                                                                    |          |                  |             |                      | X                    |                        |           |  |
| SSc-006 | X               |             |              | X                        |           |                        |                |                               |                                                                    |          |                  |             |                      |                      |                        |           |  |
| SSc-007 |                 |             |              |                          |           |                        |                |                               |                                                                    |          |                  |             |                      |                      |                        |           |  |
| SSc-008 | X               |             |              |                          |           |                        |                |                               |                                                                    |          |                  |             |                      |                      |                        |           |  |
| SSc-009 |                 |             |              |                          |           |                        |                |                               |                                                                    |          |                  |             |                      |                      |                        |           |  |
| SSc-010 | X               |             | X            |                          |           |                        |                |                               |                                                                    |          |                  |             |                      | X                    |                        |           |  |
| SSc-011 | X               |             |              |                          |           |                        |                |                               |                                                                    |          |                  |             |                      |                      |                        |           |  |
| SSc-012 |                 |             |              |                          |           |                        |                |                               |                                                                    |          |                  |             |                      |                      |                        |           |  |
| SSc-013 |                 |             |              |                          |           |                        |                |                               |                                                                    |          |                  |             |                      |                      |                        |           |  |
| SSc-014 | X               |             |              |                          |           | X                      |                |                               |                                                                    |          |                  |             | X                    |                      | X                      | X         |  |
| SSc-015 |                 |             |              |                          |           |                        |                |                               |                                                                    |          |                  |             |                      |                      | X                      |           |  |
| SSc-016 |                 |             |              |                          |           |                        | X              |                               |                                                                    |          |                  |             |                      |                      | X                      |           |  |
| SSc-017 |                 |             |              |                          |           |                        |                |                               | X                                                                  |          |                  |             |                      |                      | X                      |           |  |
| SSc-018 |                 |             |              |                          |           |                        |                |                               |                                                                    | X        |                  |             |                      |                      | X                      |           |  |
| SSc-019 |                 |             |              |                          |           |                        |                |                               |                                                                    |          | X                |             |                      |                      |                        |           |  |
| SSc-020 |                 |             | X            |                          | X         |                        |                |                               |                                                                    |          |                  |             |                      |                      | X                      |           |  |
| SSc-021 |                 |             | X            |                          | X         |                        |                |                               | X                                                                  |          |                  |             |                      |                      | X                      |           |  |
| SSc-022 |                 |             |              |                          |           |                        |                |                               |                                                                    | X        |                  |             |                      |                      |                        |           |  |
| SSc-023 |                 |             |              | X                        |           |                        |                |                               |                                                                    |          |                  |             | X                    |                      |                        |           |  |
| SSc-024 |                 |             |              |                          |           |                        |                | X                             |                                                                    |          |                  |             | X                    |                      |                        | X         |  |

## Figure S1

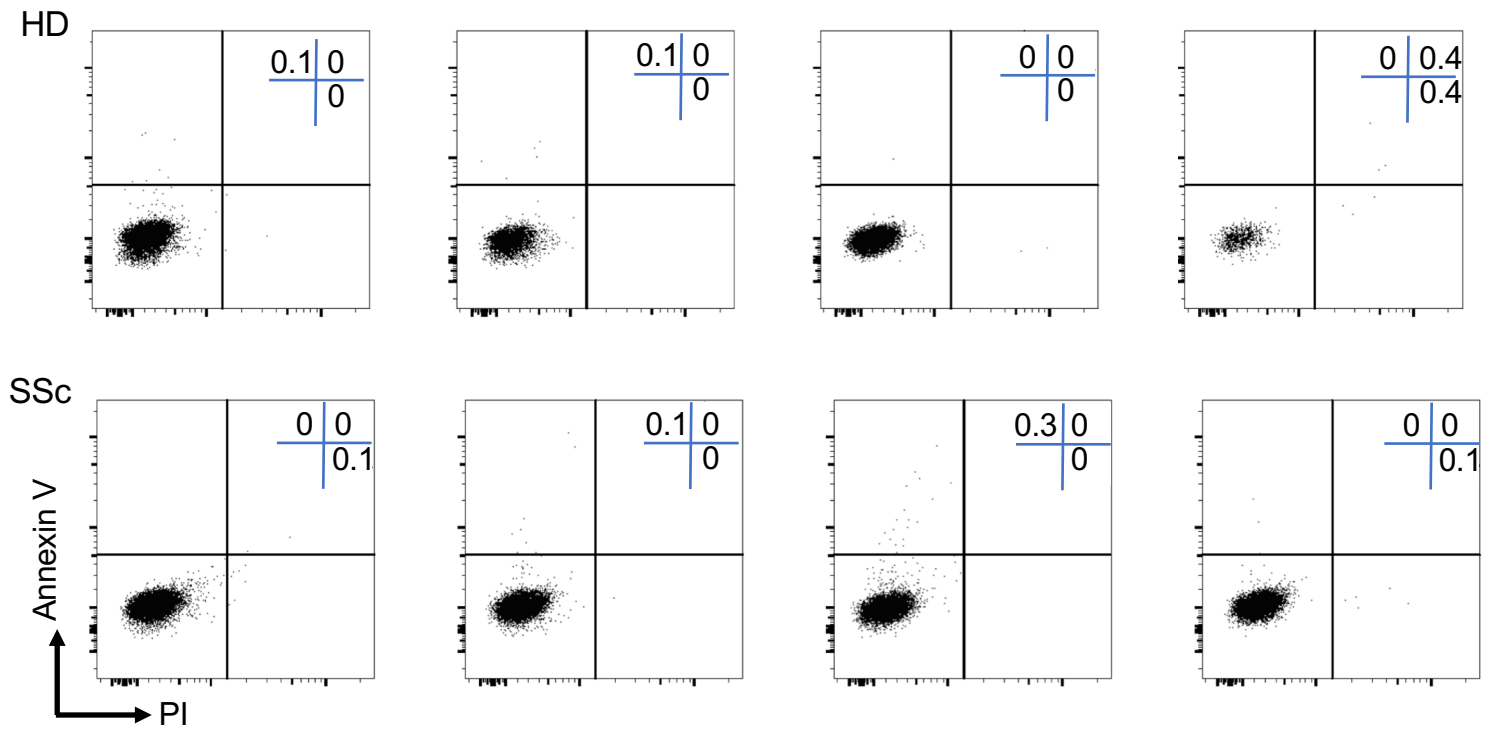

**Figure S1. Viability of human neutrophils after isolation.** Representative flow cytometry analysis of annexin V and propidium iodide (PI) staining of freshly isolated human neutrophils from peripheral blood of healthy donors (HDs) ( $n = 4$ ) and systemic sclerosis (SSc) patients ( $n = 4$ ).

## Figure S2

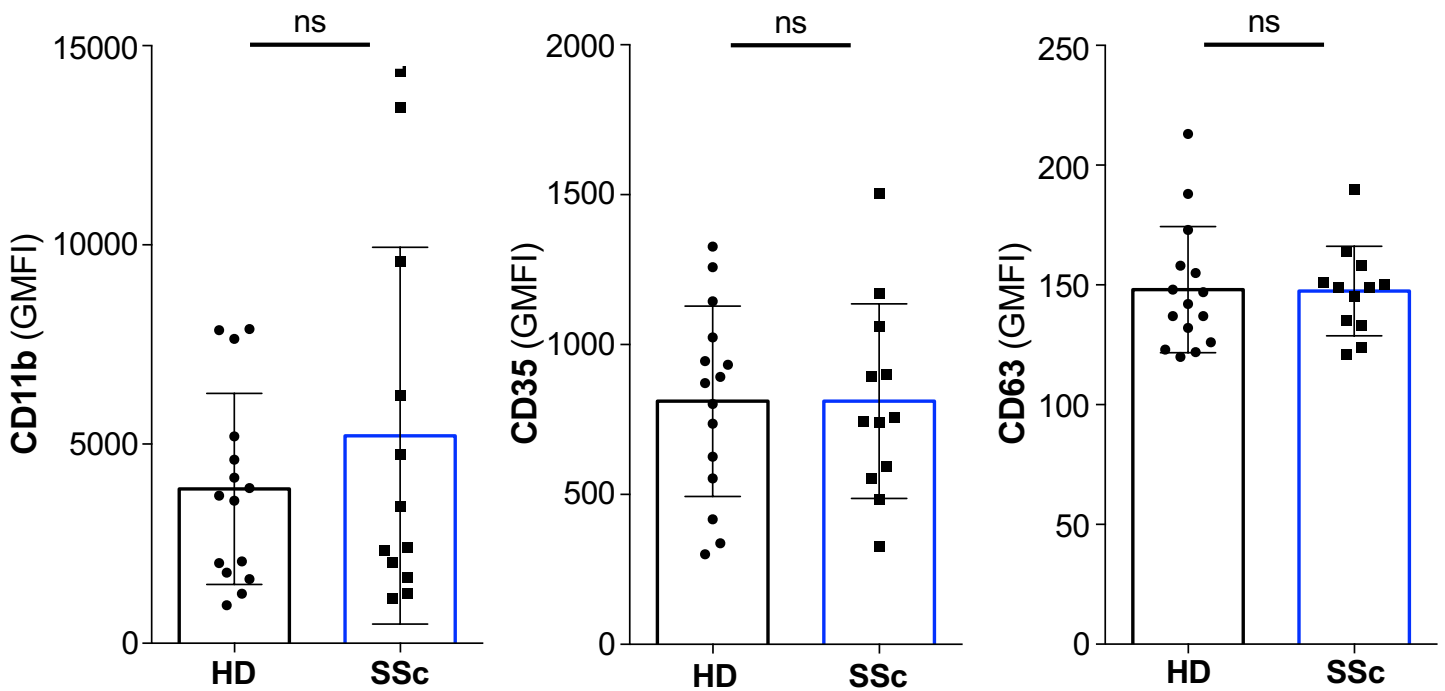

**Figure S2. Activation and degranulation markers in neutrophils of HDs and SSc patients.** Bars represent surface abundance (in geometric mean fluorescence intensity, GMFI) of CD11b (left), CD35 (middle), and CD63 (right) on freshly isolated neutrophils of HDs (black open bars;  $n = 15$ ) and SSc patients (blue open bars;  $n = 12$ ). Data are shown as mean  $\pm$  standard deviation (SD) of several donors. Each dot represents an independent and unrelated donor. Significance of differences between groups was calculated using Student's  $t$ -test; ns, not significant.

**Figure S3**

**A**

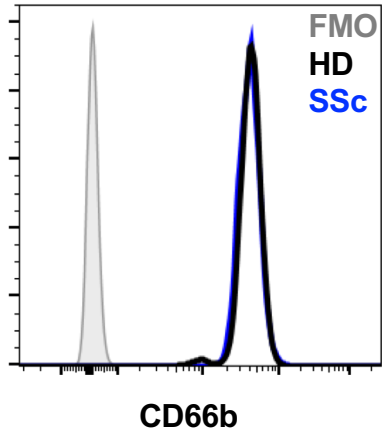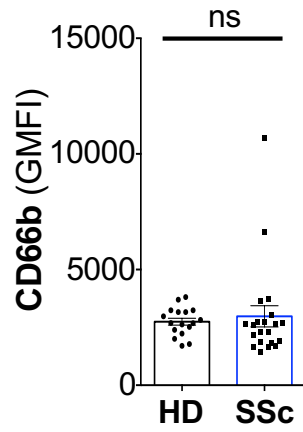

**B**

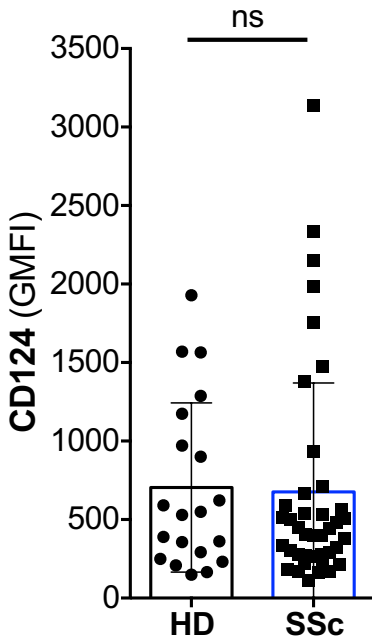

**C**

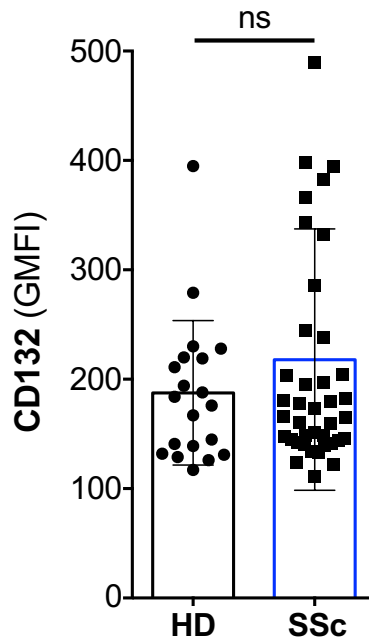

**D**

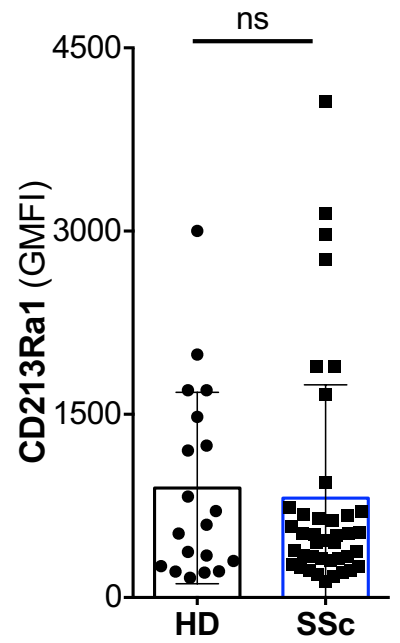

**E**

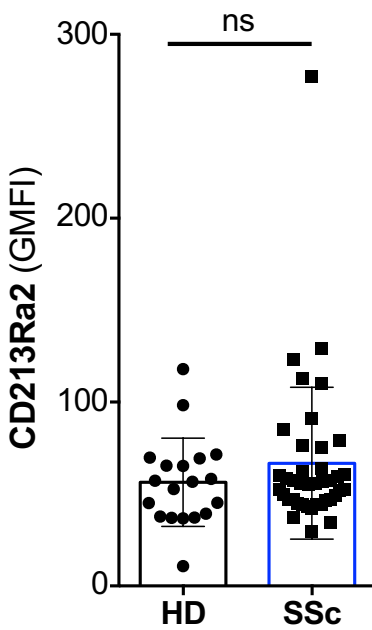

**F**

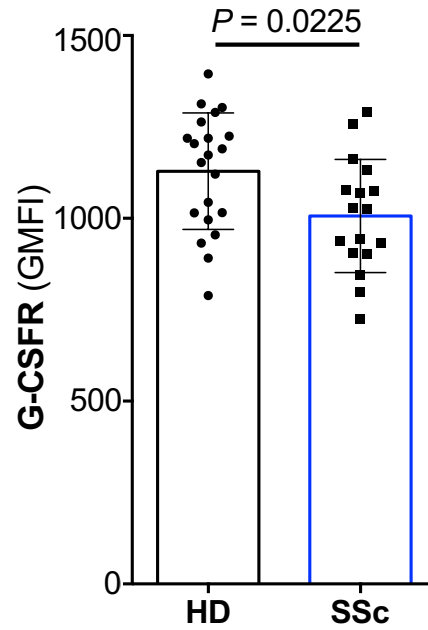

**G**

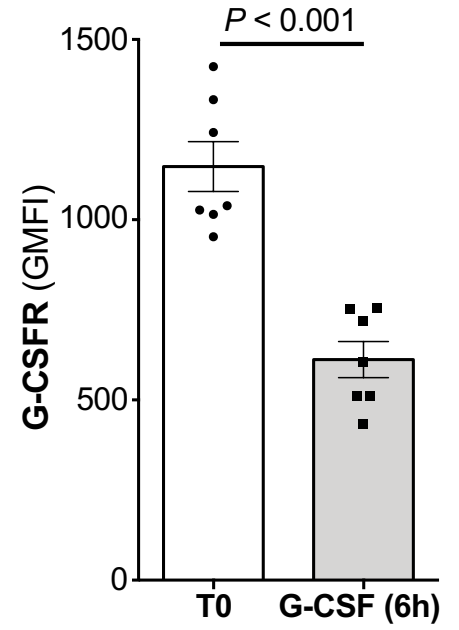

**Figure S3. Expression of CD66b, IL-4 receptor subunits, and granulocyte colony-stimulating factor receptor on neutrophils of HDs and SSc patients.** (A) Representative histogram (left) and bars of GMFI of CD66b expression in HDs ( $n = 17$ ) and SSc patients ( $n = 21$ ). (B–E) Bar histograms represent the expression of CD124 (B), CD132 (C), CD213a1 (D), and CD213a2 (E) on freshly isolated human neutrophils from HDs ( $n = 19$ ) and SSc patients ( $n = 40$ ). (F) Granulocyte colony-stimulating factor receptor (G-CSFR) surface abundance on freshly isolated human neutrophils from HDs ( $n = 21$ ) and SSc patients ( $n = 17$ ). (G) G-CSFR modulation on neutrophils from HDs after isolation (T0; open bar) or upon stimulation for 6 h with G-CSF (G-CSF (6h); grey filled bar). Bars represent the GMFI. Data are presented as mean  $\pm$  SD of independent and unrelated donors. Each dot represents an individual. Significance of differences between groups was calculated using Student's  $t$ -test; ns, not significant.

**Figure S4**

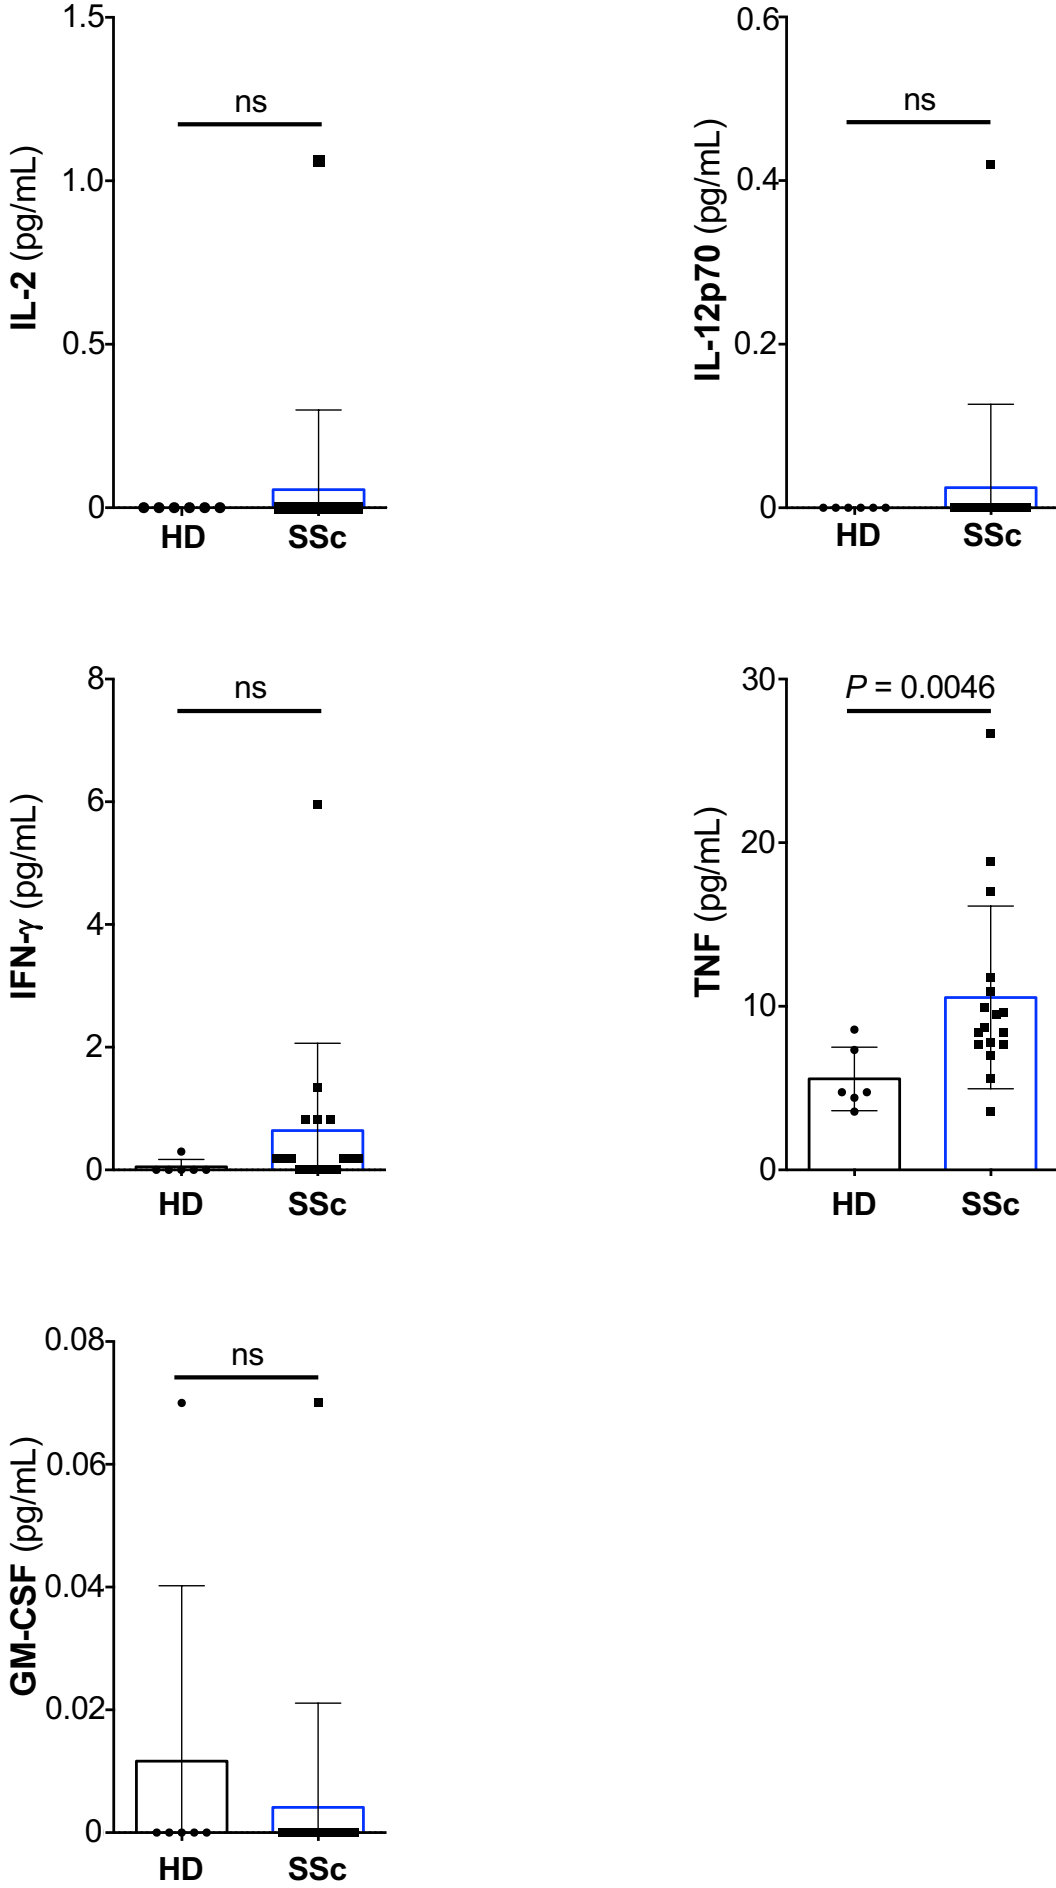

**Figure S4. Concentrations of different cytokines in serum of HDs and SSc patients.** Concentrations of indicated cytokines (in pg/mL) in serum of HDs ( $n = 6$ ) and SSc patients ( $n = 17$ ). Data are presented as mean  $\pm$  SD of independent and unrelated donors. Each dot represents an individual. Significance of differences between groups was calculated using Student's  $t$ -test. Abbreviations used: IFN, interferon; IL, interleukin; TNF, tumor necrosis factor; GM-CSF, granulocyte macrophage colony-stimulating factor.

## Figure S5

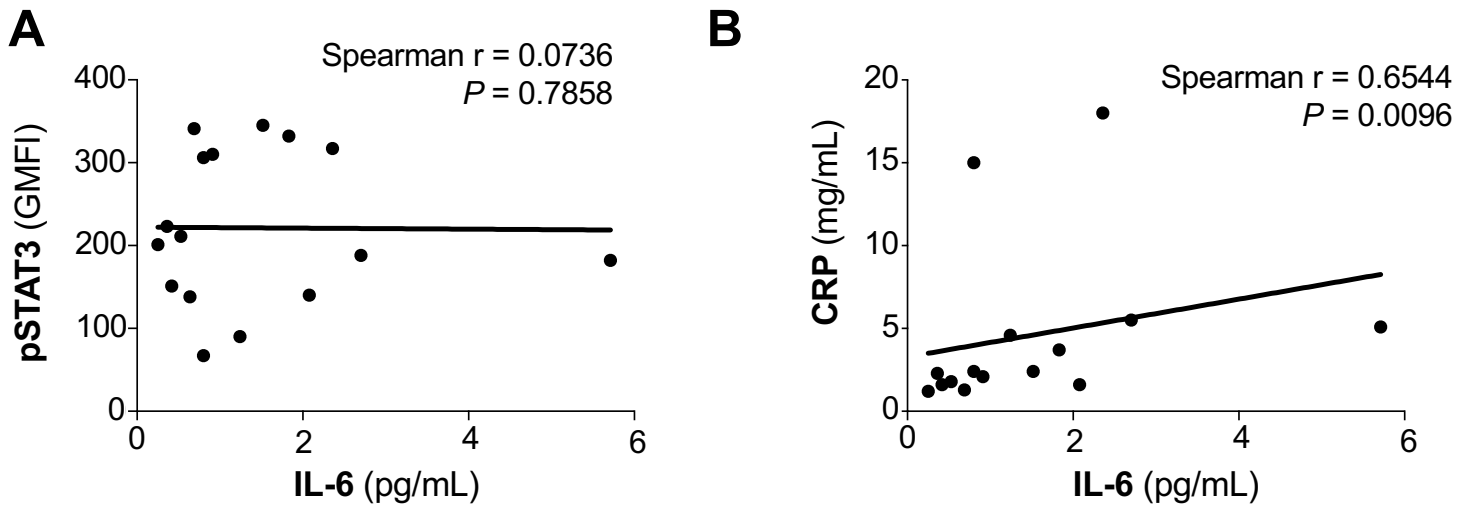

**Figure S5. Comparison of serum IL-6 concentrations in SSc patients with phosphorylated STAT3 and C-reactive protein concentrations.** (A and B) Correlation of serum IL-6 concentrations (pg/mL) with (A) phosphorylated STAT3 (pSTAT3; GMFI) and (B) C-reactive protein (CRP; mg/mL) in serum of SSc patients. Indicated are r values calculated using a Spearman test as well as P values.



## Figure S6

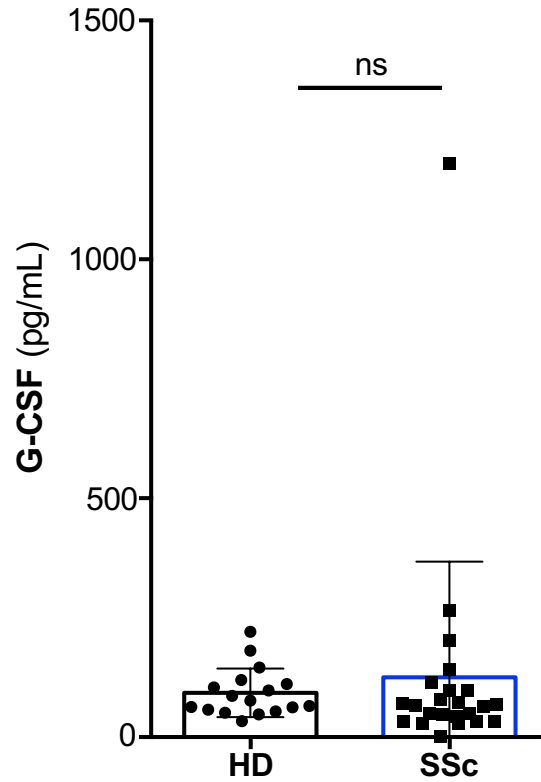

**Figure S6. Serum concentrations of G-CSF of HDs and SSc patients.** Concentrations of G-CSF (pg/ml) in serum of HDs ( $n = 17$ ) and SSc patients ( $n = 24$ ). Data are presented as mean  $\pm$  SD of independent and unrelated donors. Each dot represents an individual. Significance of differences between groups was calculated using Student's *t*-test.
